# Supplementary material
Source: Research Square preprint supplement (doi:10.21203/rs.3.rs-9440431/v1)
Supplement: Supplementary file 1 [file 237f4a88272d25e0746eed71.pdf]

## Supplementary materials

**Table S1 Collecting information of *A. rugioperculatus***

| Name of the AEZs                           | Sample collected districts | Geographical coordinates |
|--------------------------------------------|----------------------------|--------------------------|
| 1. Old Himalayan Piedmont Plain            | Thakurgaon                 | 26.0057° N, 88.3748° E   |
| 2. Active Tista Floodplain                 | Nilphamari                 | 25.9593° N, 88.8263° E   |
| 3. Tista Meander Floodplain                | Dinajpur                   | 25.6964° N, 88.6519° E   |
| 4. Karatoya-Bangali Floodplain             | Sirajganj                  | 24.1748° N, 89.5952° E   |
| 5. Lower Atrai Basin                       | Natore                     | 24.1834° N, 88.9497° E   |
| 6. Lower Punarbhaba Floodplain             | Chapainawabganj            | 24.6738° N, 88.1611° E   |
| 7. Active Brahmaputra-Jamuna Floodplain    | Gaibandha                  | 25.2816°N, 89.3512°E     |
| 8. Young Brahmaputra and Jamuna Floodplain | Jamalpur                   | 24.9351° N, 89.9282° E   |
| 9. Old Brahmaputra Floodplain              | Mymensingh                 | 24.7147° N, 90.4274° E   |
| 10. Active Ganges Floodplain               | Rajshahi                   | 24.4826° N, 88.3436° E   |
| 11. High Ganges River Floodplain           | Jashore                    | 23.1843° N, 89.1898° E   |
| 12. Low Ganges River Floodplain            | Faridpur                   | 23.6073° N, 89.8490° E   |
| 13. Ganges Tidal Floodplain                | Barishal                   | 22.6942° N, 90.3481° E   |
| 14. Gopalganj Khulna Bils                  | Bagerhat                   | 22.7747° N, 89.7056° E   |
| 15. Arial Bil                              | Munshiganj                 | 23.5382° N, 90.5186° E   |
| 16. Middle Meghna River Floodplain         | Kishoreganj                | 24.4046° N, 90.8132° E   |
| 17. Lower Meghna River Floodplain          | Chandpur                   | 23.1256° N, 90.7455° E   |
| 18. Young Meghna Estuarine Floodplain      | Noakhali                   | 22.7876° N, 90.9763° E   |
| 19. Old Meghna Estuarine Floodplain        | Cumilla                    | 23.5189° N, 90.7207° E   |
| 20. Eastern Surma Kushiyara Floodplain     | Sylhet                     | 24.9087° N, 91.9008° E   |
| 21. Sylhet Basin                           | Netrokona                  | 24.8413° N, 90.7272° E   |
| 22. Northern and Eastern Piedmont Plains   | Habiganj                   | 24.2794° N, 91.3578° E   |
| 23. Chattogram Coastal Plain               | Feni                       | 23.0127° N, 91.3751° E   |
| 24. St. Martin's Coral Island              | Saint Martin               | 20.6293° N, 92.3159° E   |
| 25. Level Barind Tract                     | Bogura                     | 24.8136° N, 89.3813° E   |
| 26. High Barind Tract                      | Naogaon                    | 24.8301° N, 88.8961° E   |
| 27. North Eastern Barind Tract             | Rangpur                    | 25.4473° N, 89.3143° E   |
| 28. Madhupur Tract                         | Gazipur                    | 23.9698° N, 90.4284° E   |
| 29. Northern and Eastern Hills             | Chattagram                 | 22.3257° N, 91.8105° E   |
| 30. Akhaura Terrace                        | Brahmanbaria               | 23.9773° N, 91.0763° E   |



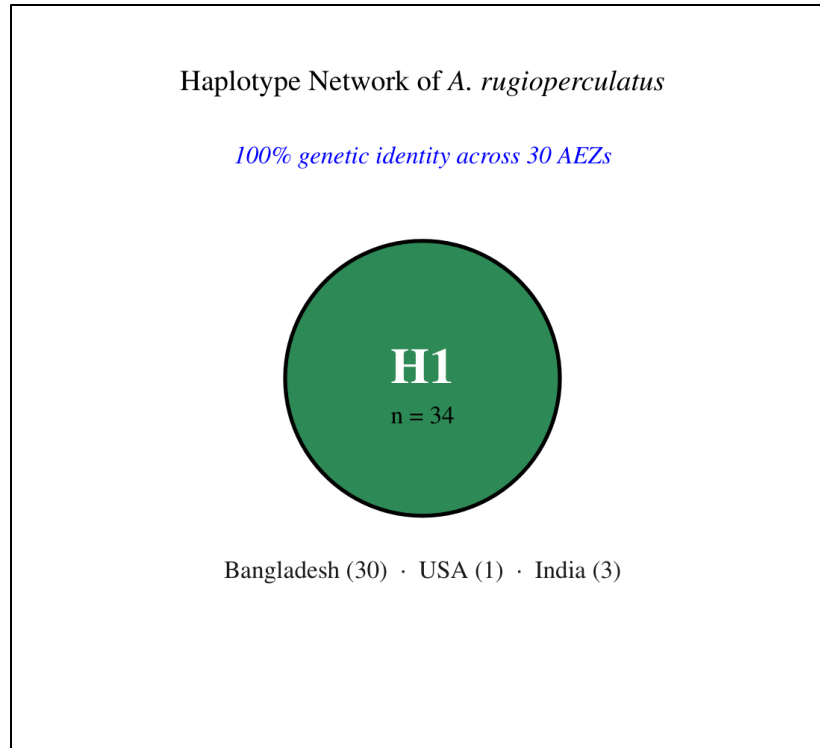

**Fig. S1** TCS haplotype network of *A. rugiopectulatus* based on 615 bp of the mitochondrial COI gene. Circle size is proportional to haplotype frequency. All 34 *A. rugiopectulatus* sequences (30 Bangladesh isolates + USA + India) collapsed into a single dominant node (H1, n = 34), with no mutational steps separating population
